# Supplementary material for: Surfactant-assisted fabrication of 3D Prussian blue-reduced graphene oxide hydrogel as a self-propelling motor for water treatment
Source: Royal Society of Chemistry journal article supplement (doi:10.1039/c5nr00759c), 2015-01-01
Supplement: c5nr00759c2.pdf [file c5nr00759c2.pdf]

Supplementary Information

**Surfactant-Assisted Fabrication of 3D Prussian Blue- Reduced  
Graphene Oxide Hydrogel as Self-Propulsion Motor for Water  
Treatment**

Jinhui Hao,<sup>†,‡</sup> Wenshu Yang,<sup>†,‡</sup> Zhe Zhang,<sup>†</sup> and Jilin Tang<sup>\*,†</sup>

<sup>†</sup>State Key Laboratory of Electroanalytical Chemistry, Changchun Institute of  
Applied Chemistry, Chinese Academy of Sciences, Changchun 130022, (P. R. China)

E-mail: jltang@ciac.ac.cn; Fax: +86 431-85262734; Tel: +86 431-85262734

<sup>‡</sup>University of Chinese Academy of Sciences, Beijing 100039 (P.R. China)

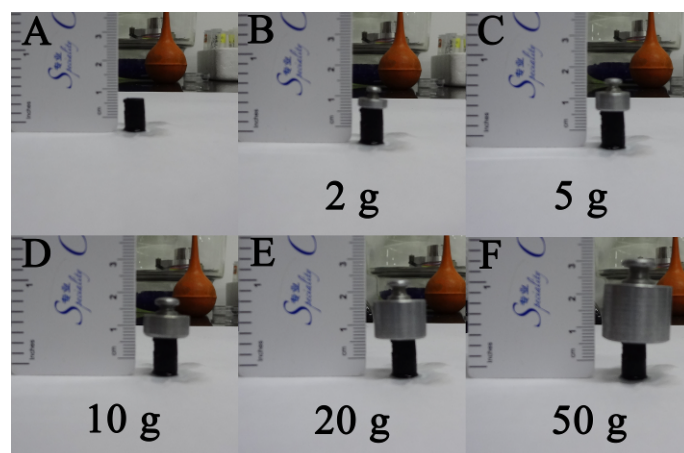

**Figure S1** Photography images of the PBSGH treated with different weights.

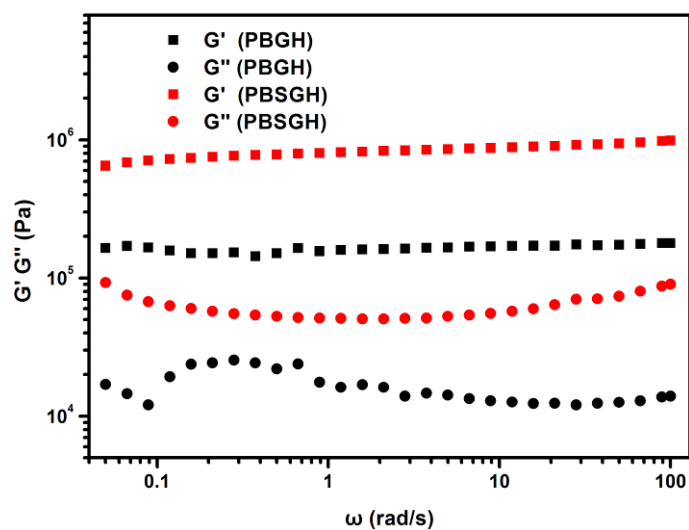

**Figure S2** Storage ( $G'$ ) and loss moduli ( $G''$ ) versus frequency ( $\omega$ ) for PBGH and PBSGH.

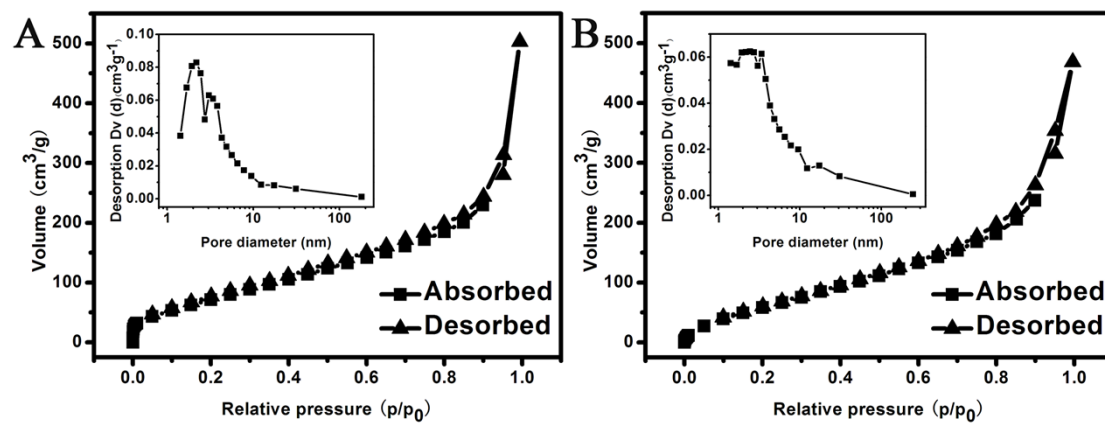

**Figure S3** N<sub>2</sub>-sorption isotherms and pore size distribution (inset) of the PBGH (A) and PBSGH (B) after freeze-drying.

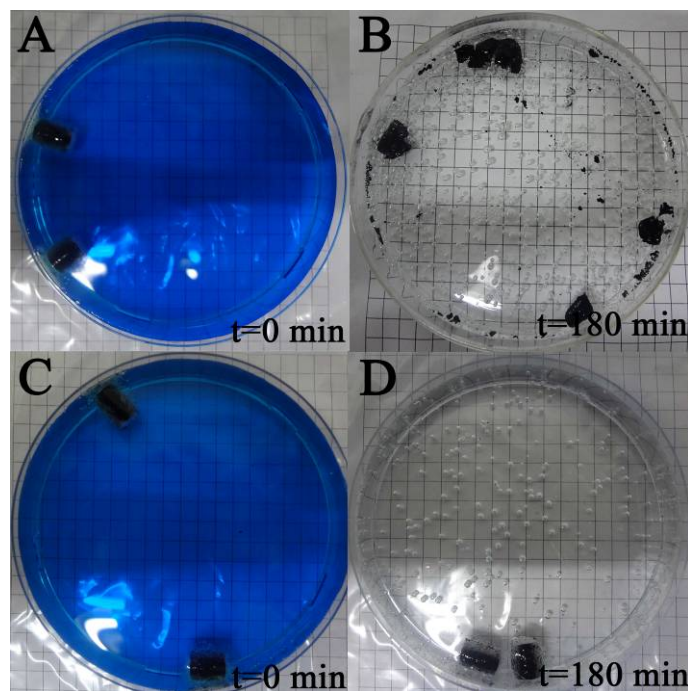

**Figure S4** Photography images of self-propulsion degradation process at 10% H<sub>2</sub>O<sub>2</sub> with PBGH (A, B) and PBSGH (C, D).

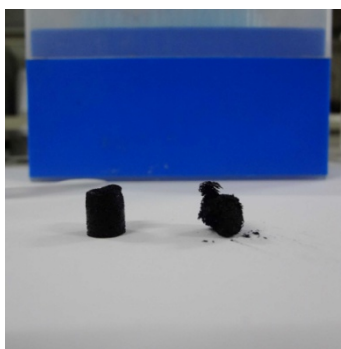

**Figure S5** Photography images of PBSGH (left) and PBGH (right) after freeze-drying.

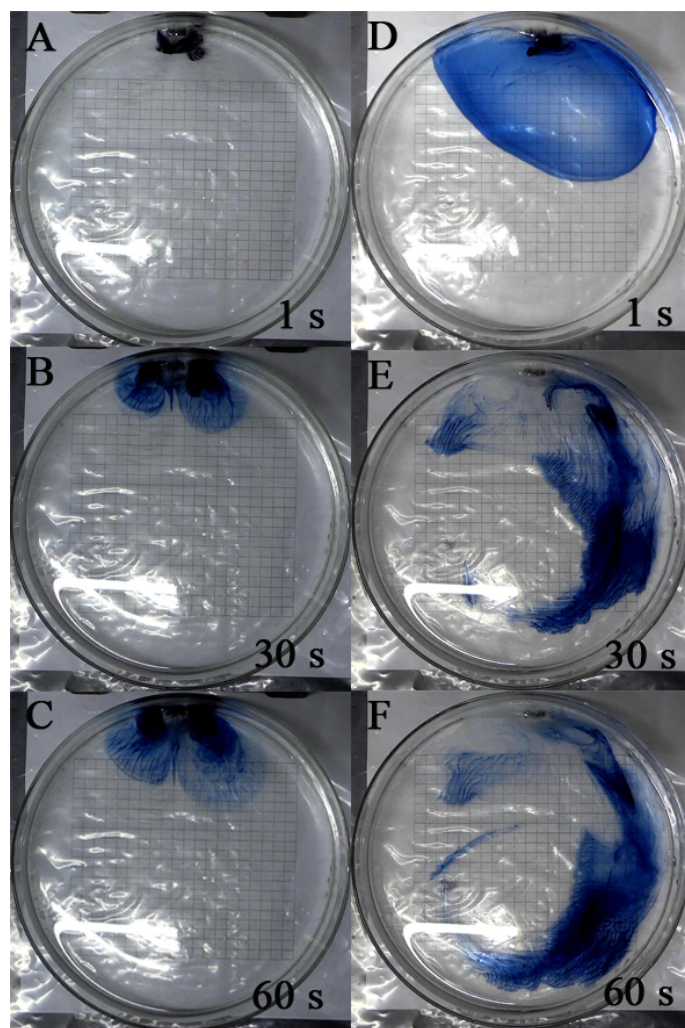

**Figure S6** Photography images of hydroxyl radicals diffusion over time at 7.5% (A, B, C) and 10% (D, E, F) H<sub>2</sub>O<sub>2</sub> with PBSGH and 100  $\mu$ L of blue ink as dye. The unit grid size is  $0.5 \times 0.5$  cm.

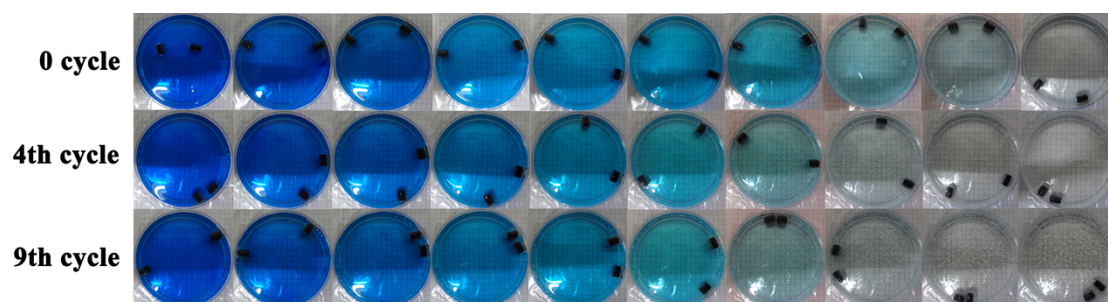

**Figure S7** Photography images of self-propulsion degradation process at 10% H<sub>2</sub>O<sub>2</sub> with different cycles.

**Table S1** ICPMS analysis of S concentration in the degradation solution and SDS standard solution.

| Solution                   | After reacting with PBSGH | After reacting with PBGH | 0.1 $\mu\text{g g}^{-1}$ SDS | 1.0 $\mu\text{g g}^{-1}$ SDS | 10 $\mu\text{g g}^{-1}$ SDS |
|----------------------------|---------------------------|--------------------------|------------------------------|------------------------------|-----------------------------|
| S [ $\mu\text{g g}^{-1}$ ] | 2.772                     | 2.574                    | 0.0357                       | 0.1294                       | 0.7007                      |

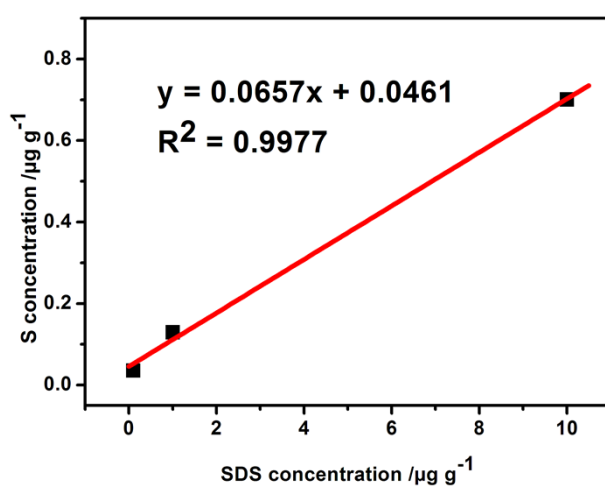

**Figure S8** The calibration curve for SDS concentration.

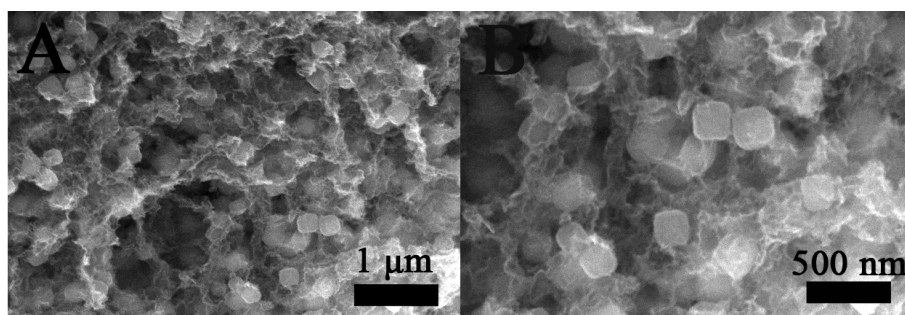

**Figure S9** FESEM images of PBSGH after cycling for 9 times.
